# Supplementary material for: TWIST1+FAP+ fibroblasts in the pathogenesis of intestinal fibrosis in Crohn’s disease
Source: PubMed Central journal article supplement (PMC11405050; doi:10.1172/jci179472), 2024-07-18

Full unedited gel for Figure7A

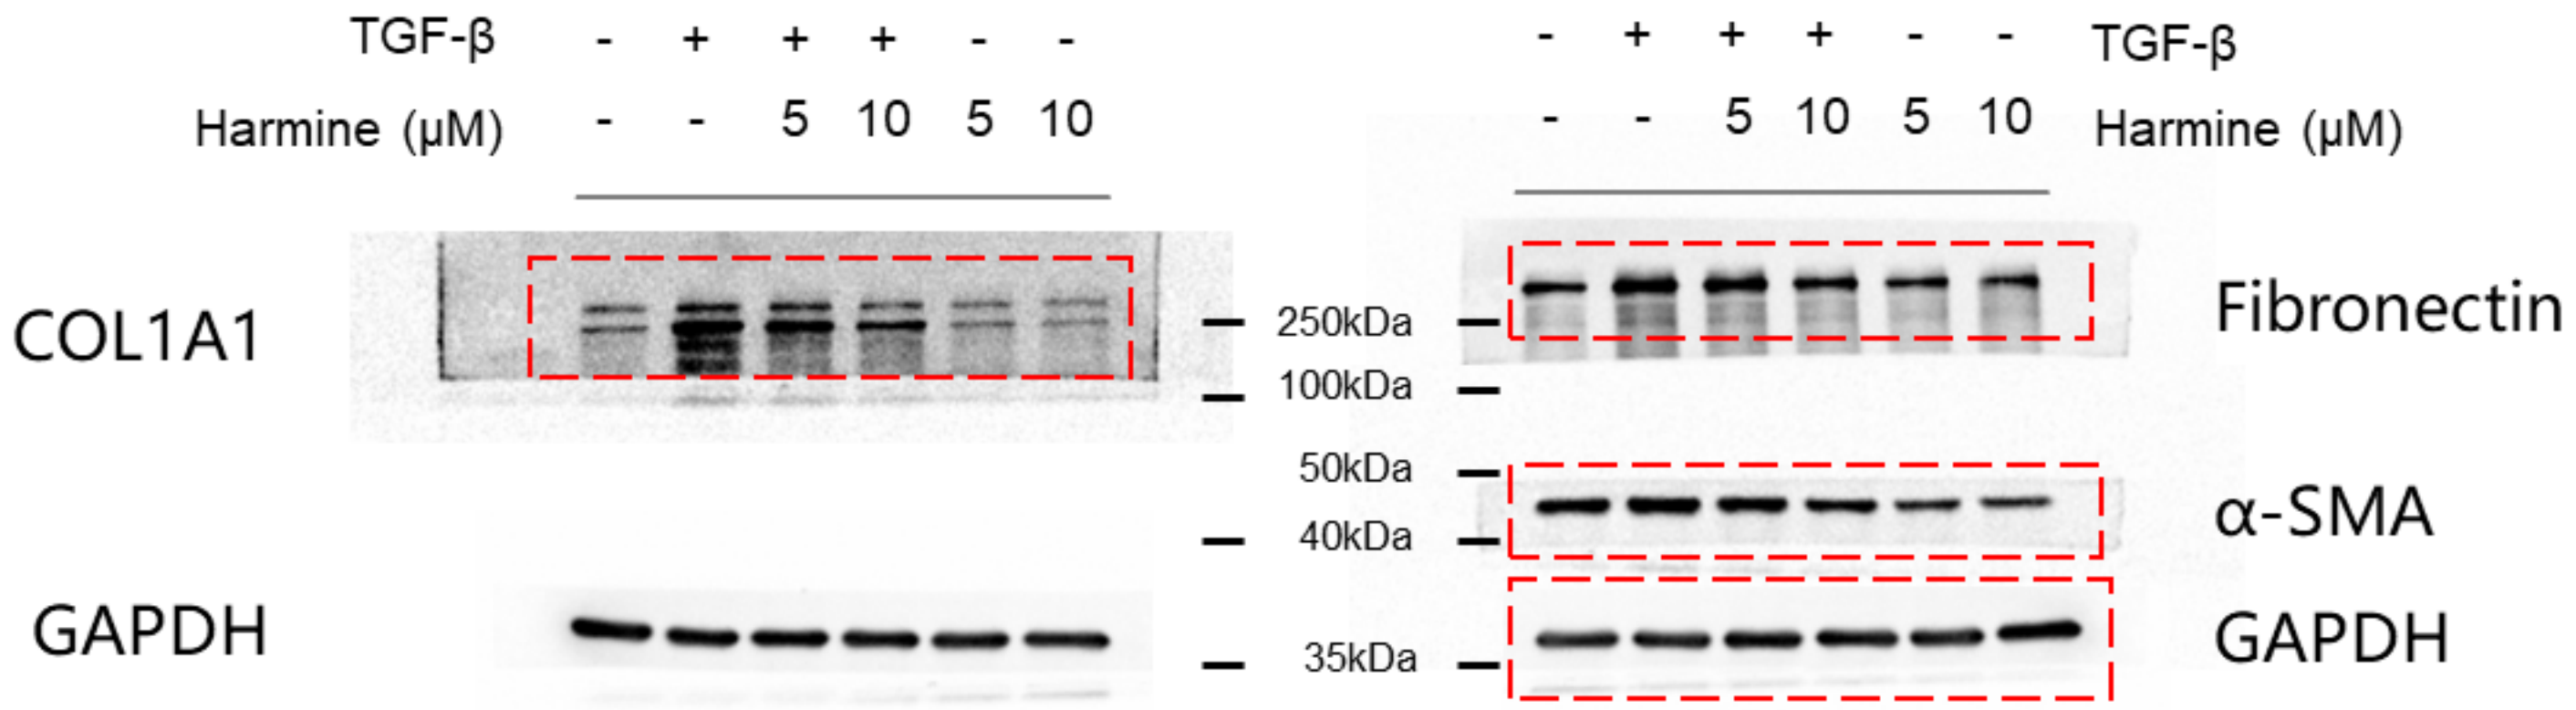

Full unedited gel for Figure7G

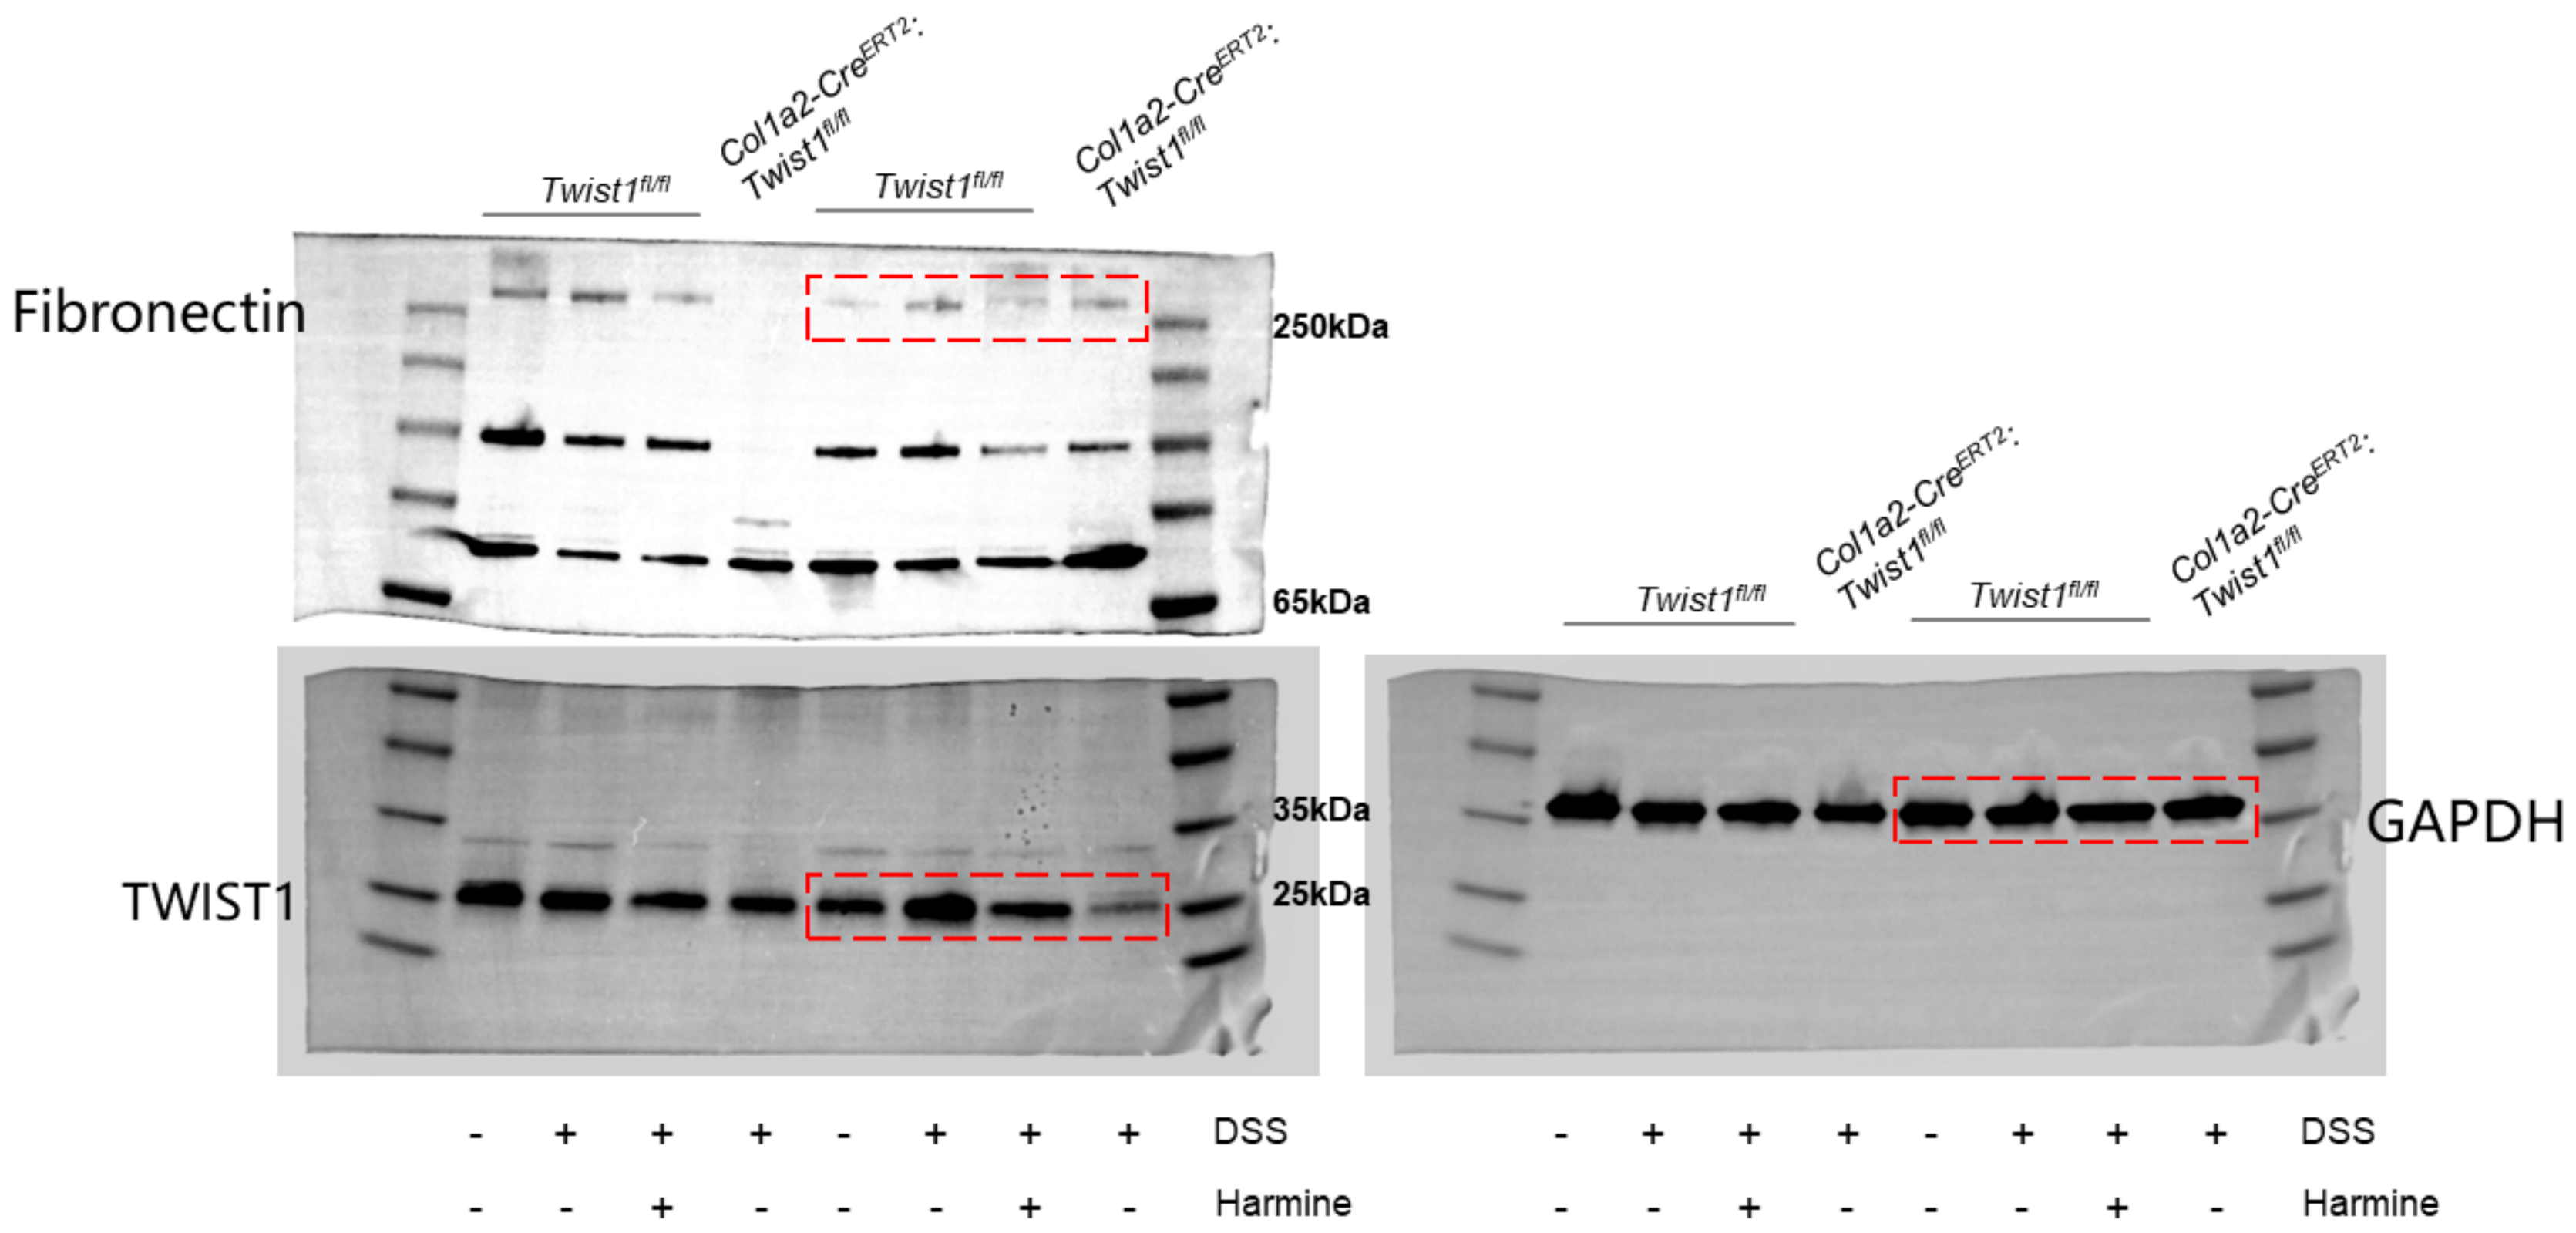

Full unedited gel for Supplemental Figure9B

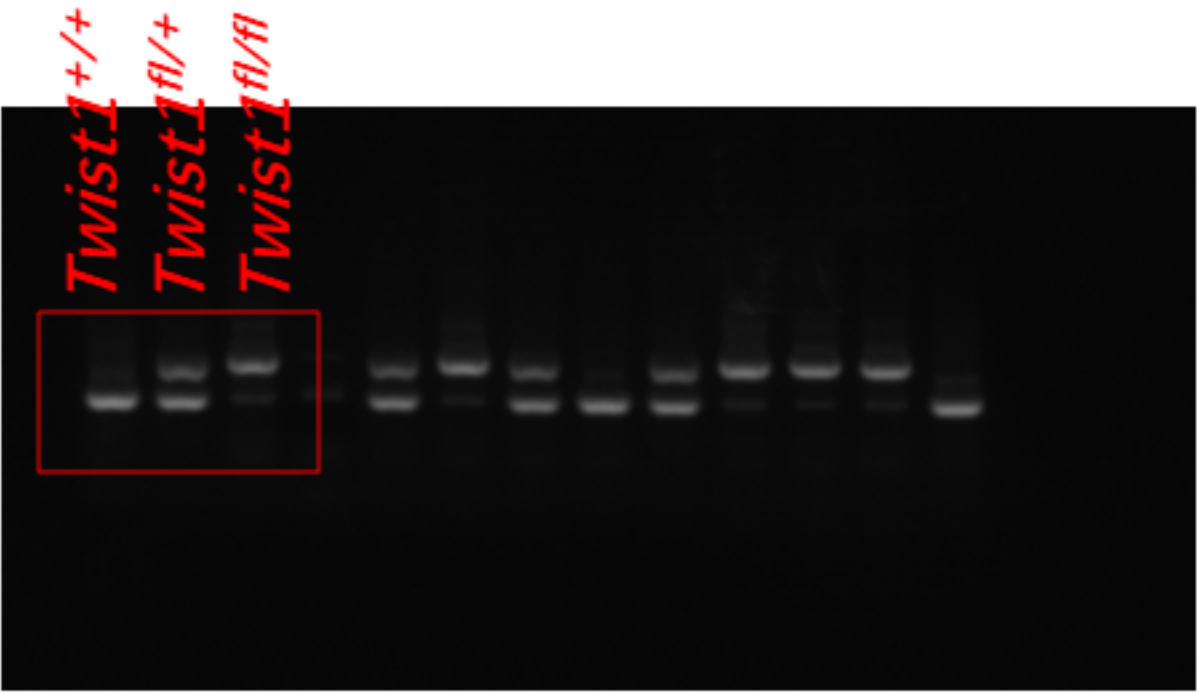

Supplement: jci-134-179472-s183.pdf [file jci-134-179472-s183.pdf]
